# Supplementary material for: Rational design of Co4N nanoparticle loaded porous carbon as a sulfur matrix for advanced lithium–sulfur batteries
Source: Royal Society of Chemistry journal article supplement (doi:10.1039/d0dt03380d), 2020-11-25
Supplement: d0dt03380d1.pdf [file d0dt03380d1.pdf]

## Supporting Information

**Rational design of Co<sub>4</sub>N nanoparticle into porous carbon as a sulfur matrix for advanced lithium-sulfur batteries**

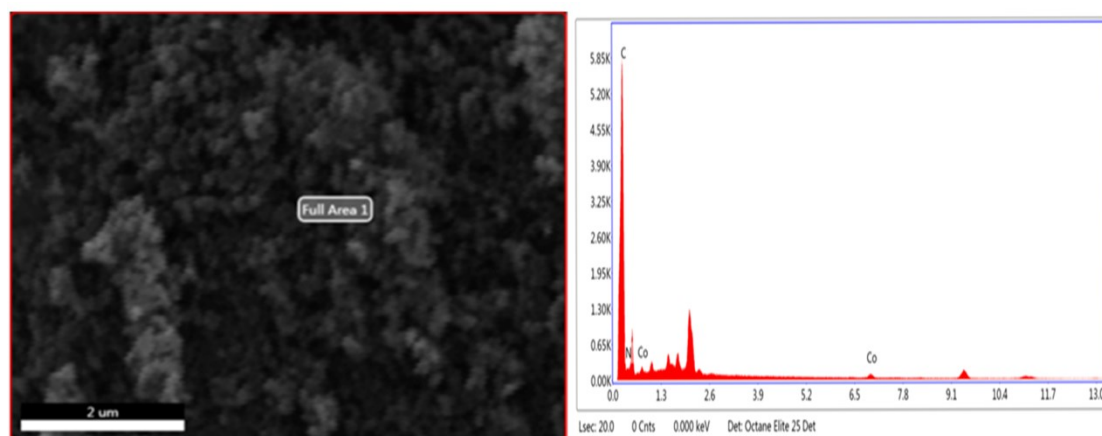

| Element | Weight % | Atomic % |
|---------|----------|----------|
| C K     | 74.92    | 78.86    |
| N K     | 22.91    | 20.68    |
| Co K    | 2.17     | 0.47     |

**Fig. S1** The EDS by SEM of KJ-Co<sub>4</sub>N .

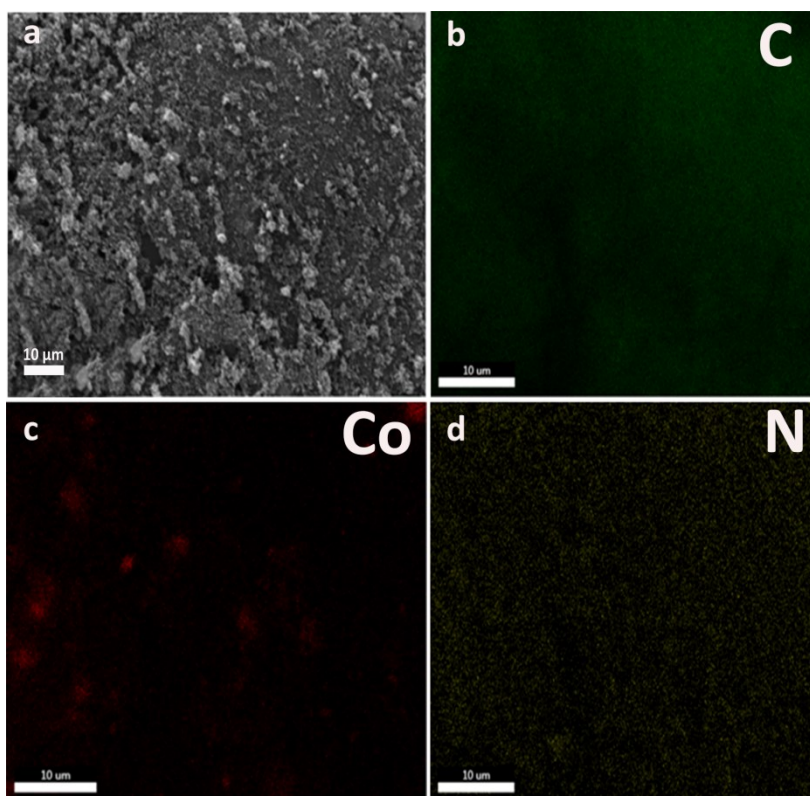

Fig. S2 (a-d) SEM image and corresponding elemental mappings of KJ-Co<sub>4</sub>N.

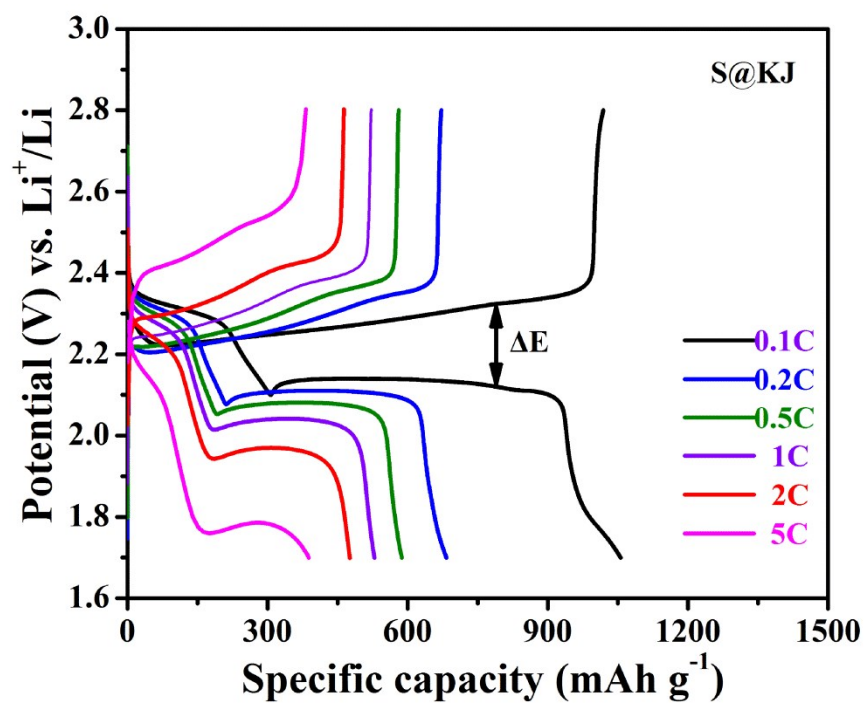

Fig. S3 Charge and discharge voltage profiles of the S@KJ cathode for the first cycle at current densities of 0.1, 0.2, 0.5, 1, 2, and 5 C.

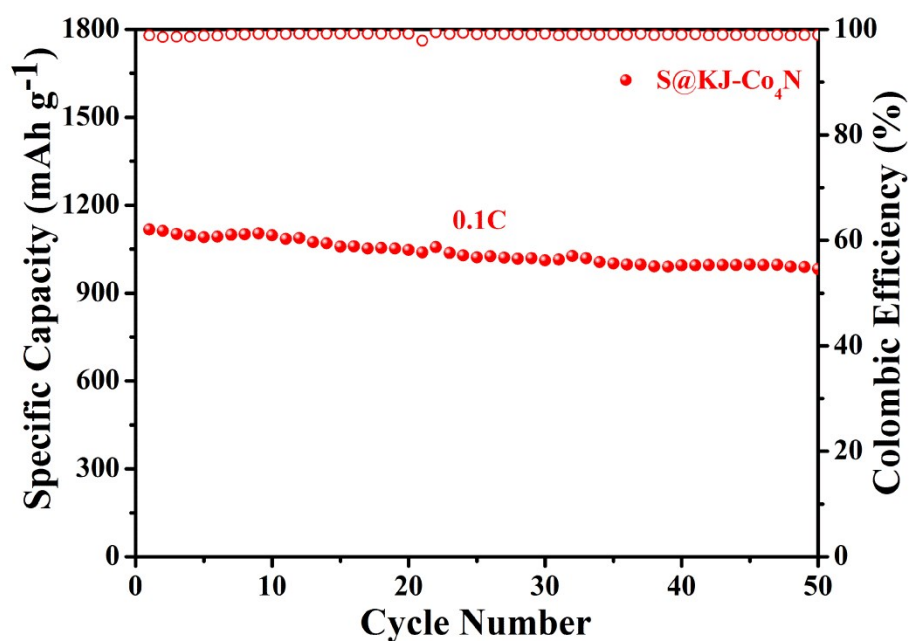

**Fig. S4** Long-term cycling performance and Coulombic efficiency of the S@KJ-Co<sub>4</sub>N cathode at 0.1 C.

| Sulfur host                           | rate | cycles | Final Capacity<br>(mAh g <sup>-1</sup> ) | References |
|---------------------------------------|------|--------|------------------------------------------|------------|
| La <sub>2</sub> O <sub>3</sub> @rGO@S | 1C   | 100    | 618.6                                    | Ref. S1    |
| BC@S@AlF <sub>3</sub>                 | 0.5C | 100    | 869                                      | Ref. S2    |
| S@TiO <sub>2</sub> @GA                | 1C   | 200    | 540                                      | Ref. S3    |
| ZnO@rGO@S                             | 0.1C | 100    | 949                                      | Ref. S4    |
| Co-NiSe <sub>2</sub> @NC-S            | 0.5C | 200    | 544.6                                    | Ref. S5    |
| S@KJ-Co <sub>4</sub> N                | 0.5C | 200    | 739                                      | This Work  |
|                                       | 1C   | 400    | 575.1                                    |            |

**Table S1.** Comparison of cyclabilities of previous excellent works and our reports on Li-S batteries.

## References

- S1. Y.L. Yang, Y. Yu, G.Z. Ma, J.M. Nan, H.Y. Chen, Z.Y. Zhang, W.Y. Lin, 2019, **45** ,9017-9024.
- S2. Z. Luo, X. Wang, W. Lei, P. Xia, Y. Pan, Journal of Materials Science & Technology, 2020, **55**, 159-166.
- S3. M. Wang, S. Tan, S. Kan, Y. Wu, S. Sang, K. Liu, H. Liu, Journal of Energy Chemistry, 2020, **49**, 316-322.
- S4. Z. Zhang, Z. Yi, L. Liu, J. Yang, C. Zhang, X. Pan, F. Chi, Nanomaterials (Basel), 2020, **10**, 1633.
- S5. T. Chen, Z. Shang, B. Yuan, N. Wu, M. Abuzar, J. Yang, X. Gu, C. Miao, M. Ling, S. Li, Energy Technology, 2020,**8**.
